# Supplementary material
Source: PubMed Central journal article supplement (PMC3874454)

## Supplemental Figure Legends

Supplemental Figure 1. Pancreatic immunostaining reveals detection of GATA4 but unreliable detection of GATA6 in primary islets. (a) Immunostaining for GATA4 (white) in *Gata4* control mice. (b) Immunostaining for GATA4 (white) in  $\beta$ -cell inducible *Gata4* knockouts.

Supplemental Figure 2.  $\beta$ -cell inducible deletion of *Gata4* and *Gata6* is efficient. (a) Schema indicating  $\beta$ -cell inducible deletion of *Gata4* or *Gata6*. (b) RT-PCR of cDNA preps from *Gata4* knockout and control islets one week following deletion. (c) Amplification of *Gata4* genomic DNA from equivalent knockouts and controls. (d) RT-PCR of cDNA preps from *Gata6* knockout and control islets one week following deletion. All data are reported as mean  $\pm$  standard error for 4-5 biological replicates per condition.

Supplemental Figure 3. Several physical and morphometric measures are unaltered following inducible *Gata* deletion. (a) Schema indicating timing of deletion. (b) Measurements of weight change, blood glucose,  $\beta$ -cell area, mass and proliferation are shown for cohorts of at least 4 mice per condition. Data are expressed as mean  $\pm$  standard error.

Supplemental Figure 4.  $\beta$ -cell inducible *Gata4* or *Gata6* deletion does not severely impact glucose homeostasis. (a) Schema indicating timing of *Gata4* deletion and washout followed by glucose tolerance testing. (b) Glucose tolerance tests from  $\beta$ -cell inducible *Gata4* knockouts and controls. Data are reported as mean  $\pm$  standard error for 11 knockouts and 5 controls. (c) Schema indicating timing of  $\beta$ -cell inducible *Gata4* or *Gata6* deletion followed by high fat feeding. (d) Glucose tolerance tests from  $\beta$ -cell inducible *Gata4* (left) or *Gata6* (right) mice fed high fat diet for the indicated time. Data

are reported as mean  $\pm$  standard error for 3 knockouts and 4 controls (*Gata4* deletion) and 7 knockouts and 2 controls (*Gata6* deletion).

Supplemental Figure 5.  $\beta$ -cell inducible *Gata4 Gata6* compound deletion impairs  $\beta$ -cell survival. (a) Schema indicating timing of *Gata4 Gata6* deletion and high fat feeding. (b) Quantification of intra-islet TUNEL positive cells for high fat-fed  $\beta$ -cell inducible *Gata4 Gata6* double knockouts and controls, harvested 11 weeks following deletion. Pancreata from 5 mice per condition ( $>10,000$   $\beta$ -cells) were machine counted and curated by hand. (c)  $\beta$ -cell mass measurements from high fat-fed  $\beta$ -cell inducible *Gata4 Gata6* double knockouts. 8-12 pancreas sections per mouse, 5 mice per condition were analyzed (d) Glucose tolerance tests from high fat-fed  $\beta$ -cell inducible *Gata4 Gata6* double knockouts. Data are reported as mean  $\pm$  standard error for 10 knockouts and 5 controls.

Supplemental Figure 6. (a) Schema indicating timing of  $\beta$ -cell inducible *Gata4* deletion followed by gene expression studies. (b) RT-PCR of islet cDNA from  $\beta$ -cell inducible *Gata4* (left) and *Gata6* (right) knockouts. Several genes related to programmed cell death were chosen for analysis. Data are reported as mean  $\pm$  standard error for 4-5 biological replicates per condition. (c) Schema indicating timing of  $\beta$ -cell inducible *Gata4* deletion followed by low dose STZ treatment. (d) Quantification of intra-islet TUNEL positive cells in *Gata4* deficient islets and controls following treatment with low dose STZ. Note, plotted next to untreated knockouts and control mice from (2c). Pancreata from 4-5 mice per condition ( $>10,000$   $\beta$ -cells) were machine counted and curated by hand.

Supplemental Figure 7. Thapsigargin induces a robust transcriptional response in  $\beta$ -cells. (a) RT-PCR analysis of cultured wildtype islets treated with 1  $\mu$ M thapsigargin or DMSO control for various incubation times. Experiments performed in triplicate, with  $\sim 30$  islets per batch. Data are reported as mean  $\pm$  standard error.

Supplemental Figure 8.  $\beta$ -cell inducible *Gata4* deletion does not affect calcium homeostasis. (a) *Gata4* control (top) and knockout (bottom) islet calcium measurements in response to perfusion in a glucose step gradient. Data are reported as mean  $\pm$  standard error for 5 replicates.

Supplemental Figure 9. *Gata4* deletion results in a heterogeneous population of sub-cellular abnormalities in  $\beta$ -cells. A range of raw electron micrographs from control (a) and  $\beta$ -cell inducible *Gata4* knockouts (b). Arrows indicated endoplasmic reticulum, arrowheads indicate mitochondria. Scale bars represent 500nm.

Supplemental Table 1. Genotyping and RT-PCR primers used in this study. (a) Forward primer, reverse primer, and probe (with 5' and 3' modifications) used in gene expression and genotyping experiments.

**a** *Gata4* Control

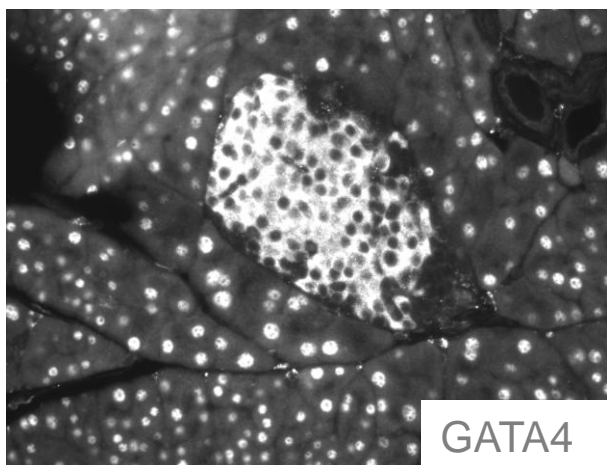

**b**  $\beta$ -cell inducible *Gata4* knockout

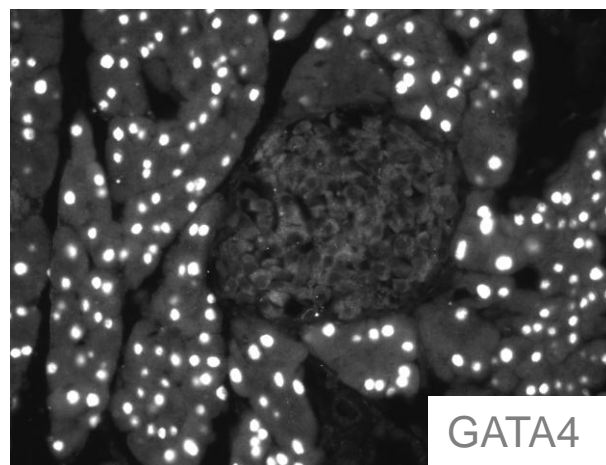

**a**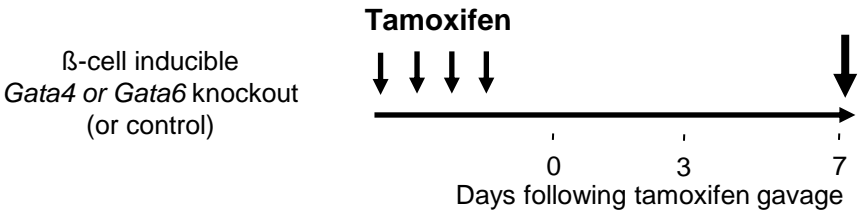**b**

GATA4 Expression / Cyclophilin (% Control)

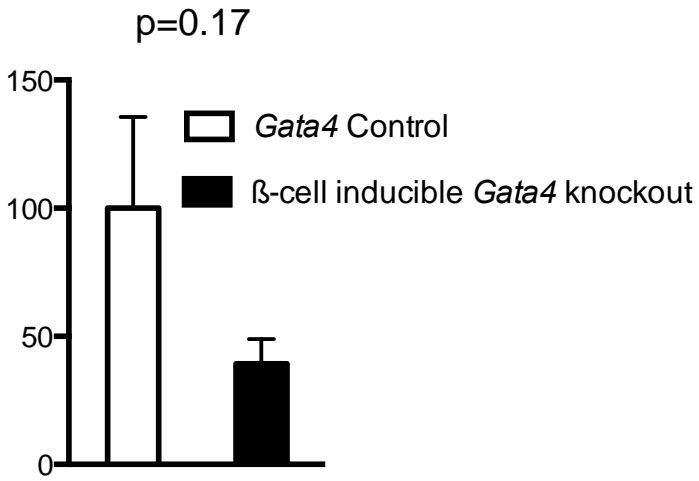**c**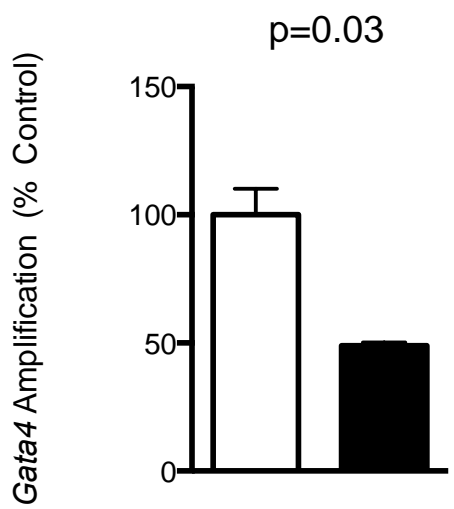**d**

GATA6 Expression / Cyclophilin (% Control)

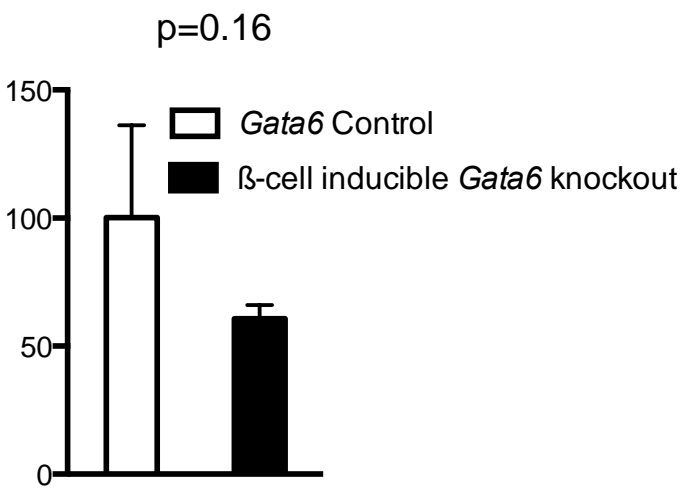

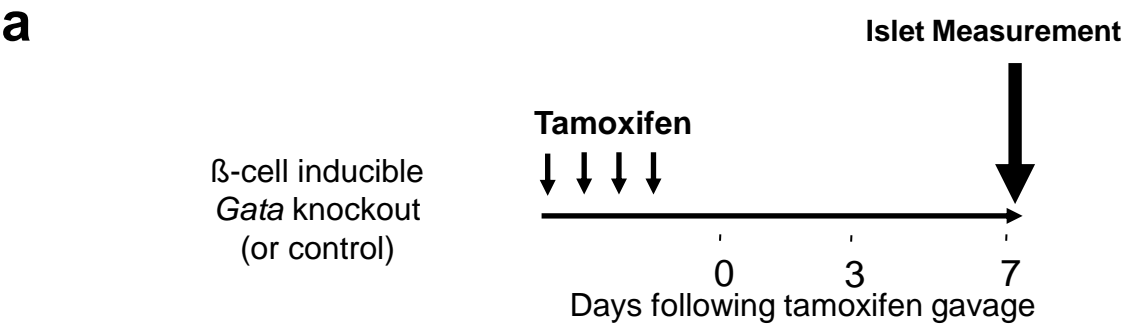

b

| Group                                                                   |           | Physiological Observations |                   |                       |                          | Islet Measurements |                  |                   |                   |
|-------------------------------------------------------------------------|-----------|----------------------------|-------------------|-----------------------|--------------------------|--------------------|------------------|-------------------|-------------------|
|                                                                         |           | Weight (g)                 | Weight at harvest | Blood glucose (mg/dL) | Blood glucose at harvest | β-cell area (%)    | β-cell mass (mg) | ki67+ β-cells (%) | IDU + β-cells (%) |
| Gata4 control<br>(Gata4 loxP/loxP)                                      | average   | 25.02                      | 22.73             | 158.33                | 141.5                    | 0.48               | 0.12             | 0.95              | 4.04              |
|                                                                         | std error | 2.44                       | 2.08              | 9.85                  | 10.6                     | 0.05               | 0.01             | 0.34              | 0.87              |
| β-cell Inducible Gata4 Knockout<br>(Gata4 loxP/loxP Ins2-CreERT)        | average   | 27.03                      | 24.8              | 169.14                | 156.57                   | 0.59               | 0.12             | 1.43              | 2.93              |
|                                                                         | std error | 2.05                       | 1.83              | 13.9                  | 13.25                    | 0.05               | 0.04             | 0.39              | 0.77              |
| Gata6 control<br>(Gata6 loxP/loxP)                                      | average   | 29.90                      | 26.43             | 135.25                | 128.75                   |                    |                  |                   |                   |
|                                                                         | std error | 1.94                       | 2.11              | 12.13                 | 3.82                     |                    |                  |                   |                   |
| β-cell Inducible Gata6 Knockout<br>(Gata6 loxP/loxP Ins2-CreERT)        | average   | 28.33                      | 26.72             | 129.00                | 140.00                   |                    |                  |                   |                   |
|                                                                         | std error | 2.04                       | 6.76              | 2.10                  | 10.16                    |                    |                  |                   |                   |
| Gata4 control<br>(Gata4 loxP/loxP)                                      | average   | 21.58                      | 22.87             | 155.33                | 124.17                   |                    |                  |                   |                   |
|                                                                         | std error | 1.82                       | 1.81              | 15.27                 | 8.21                     |                    |                  |                   |                   |
| Whole Body Inducible Gata4<br>Knockout<br>(Gata4 loxp/loxP Ubc-CreERT2) | average   | 20.88                      | 22.82             | 144.20                | 155.60                   |                    |                  |                   |                   |
|                                                                         | std error | 1.59                       | 1.70              | 11.97                 | 13.07                    |                    |                  |                   |                   |

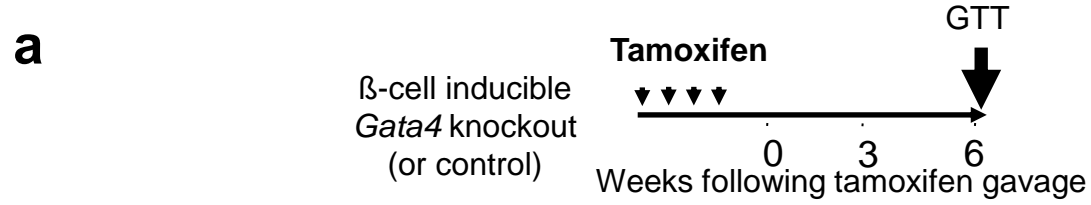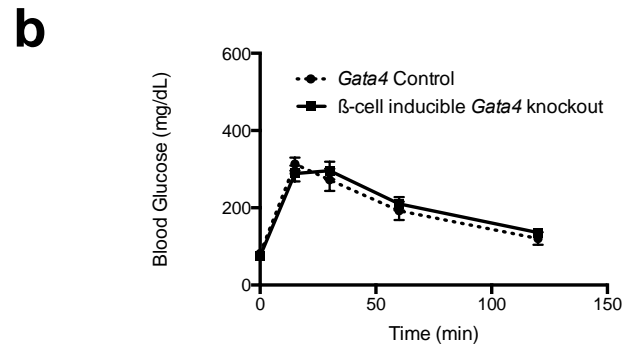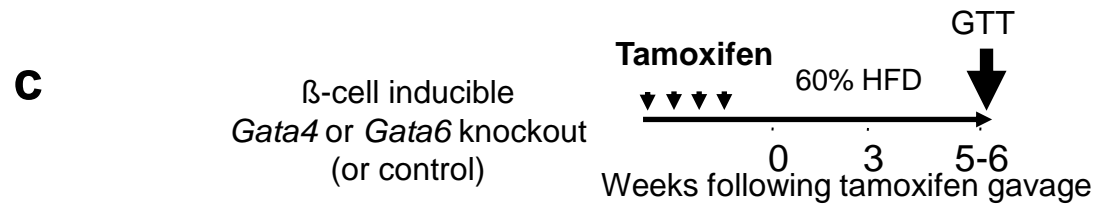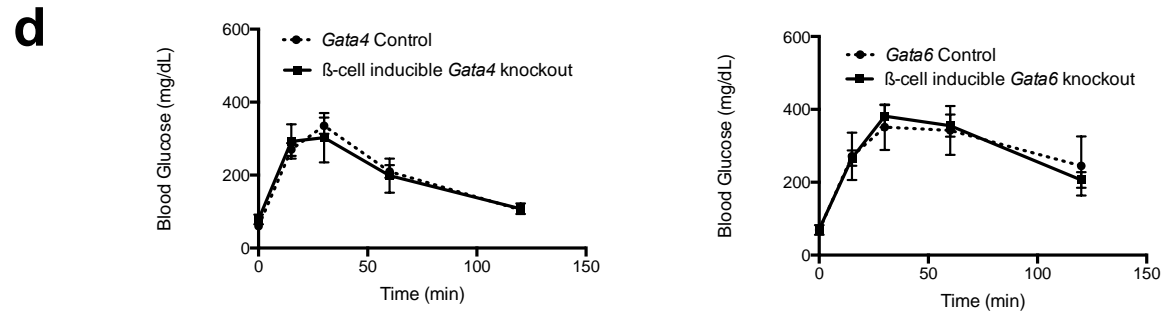

**a**

$\beta$ -cell inducible  
*Gata4* *Gata6* double knockout  
(or control)

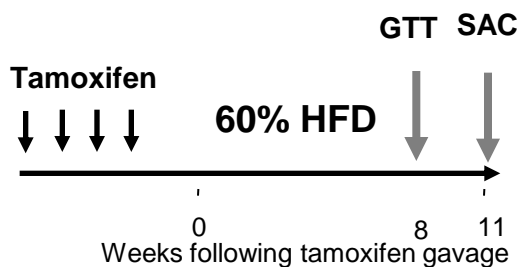**b**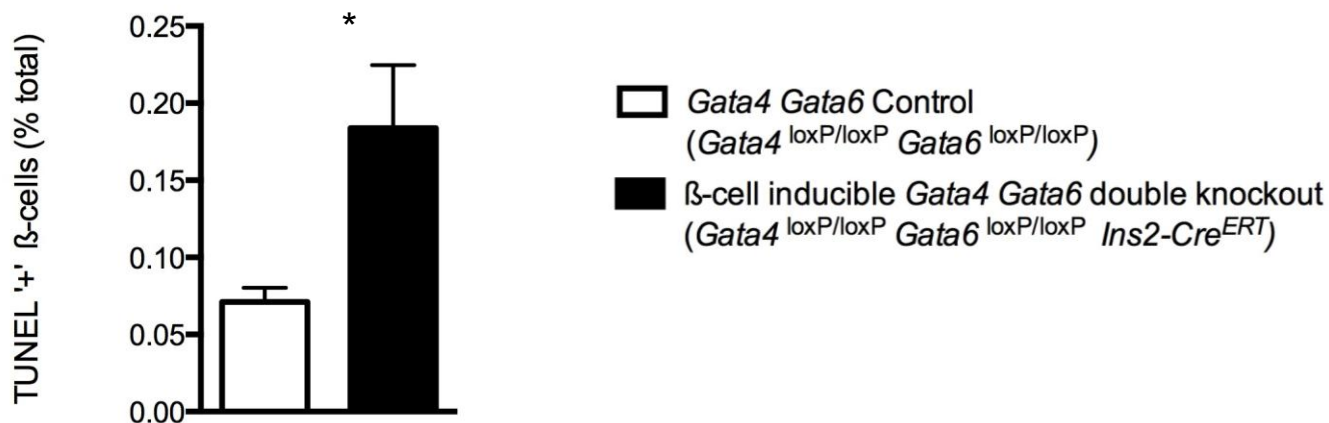**c**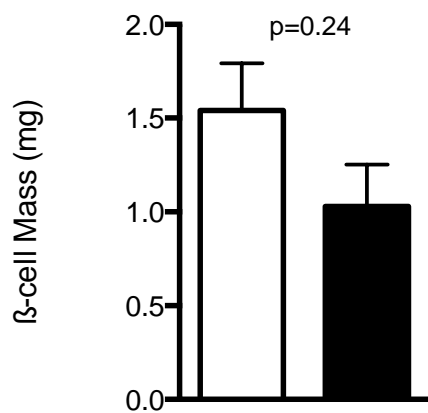**d**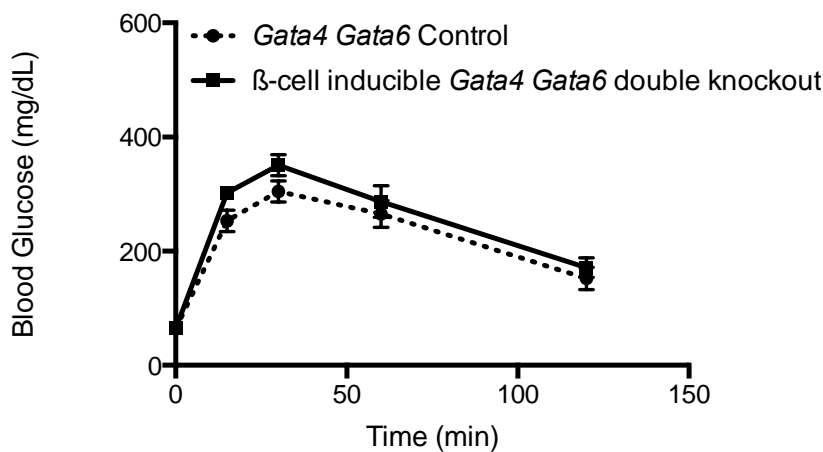

**a**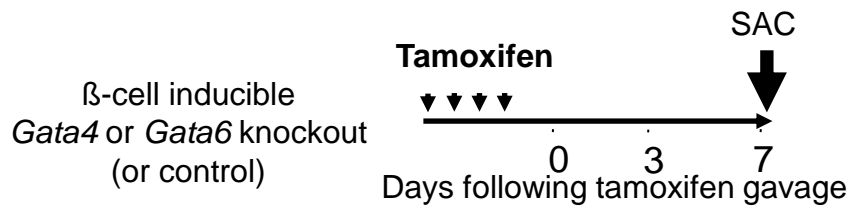**b**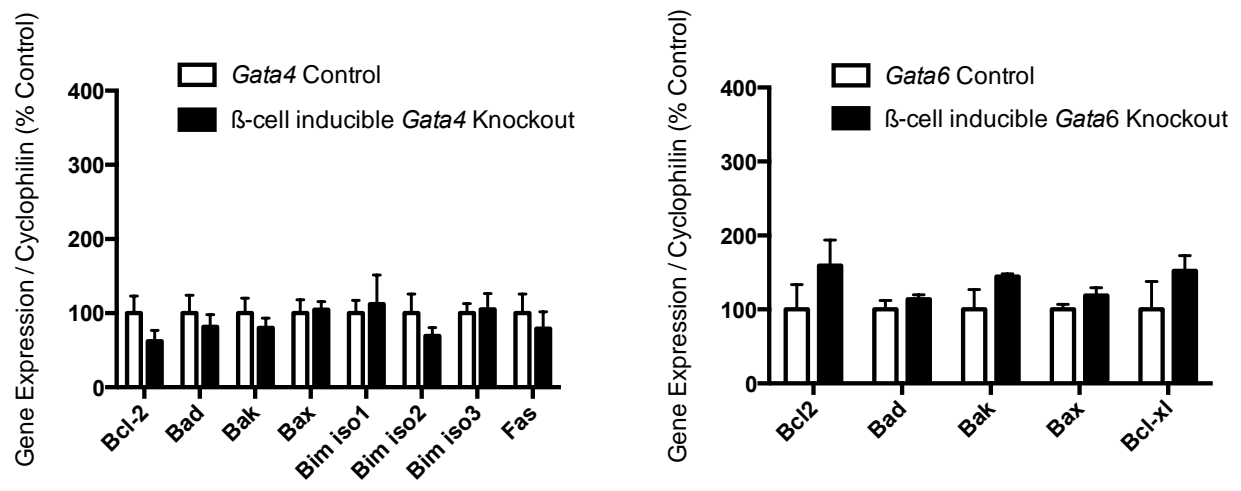**c**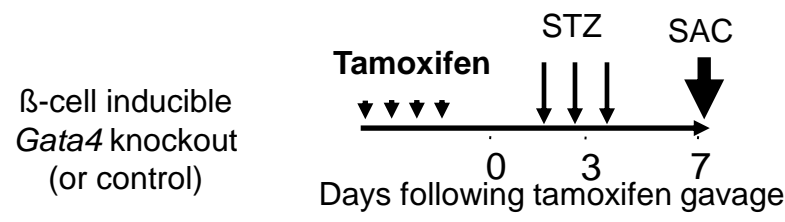**d**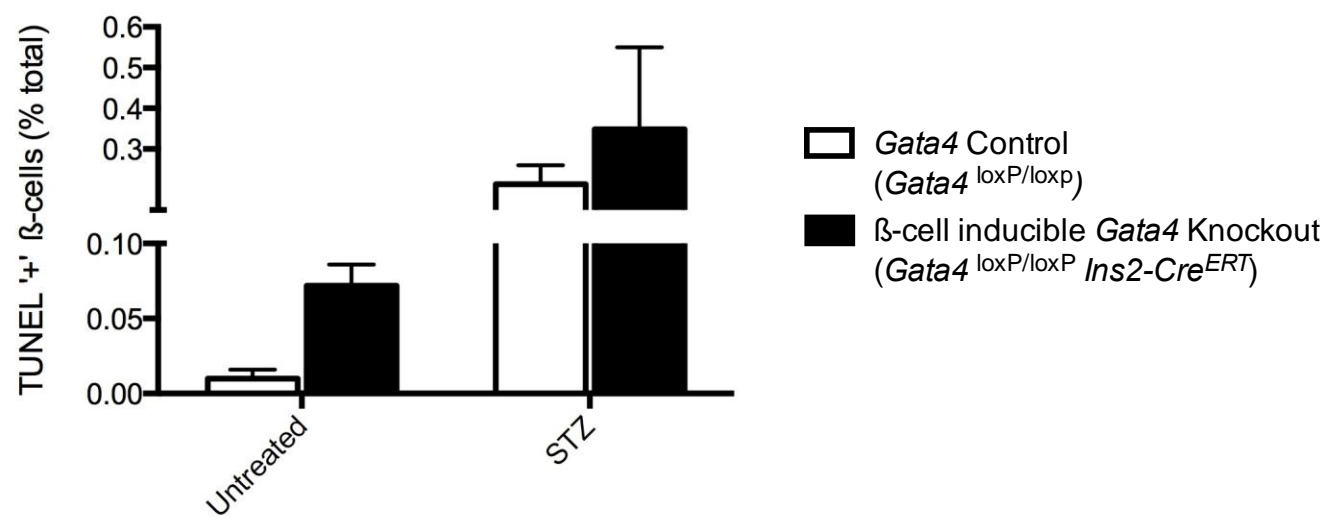

**a**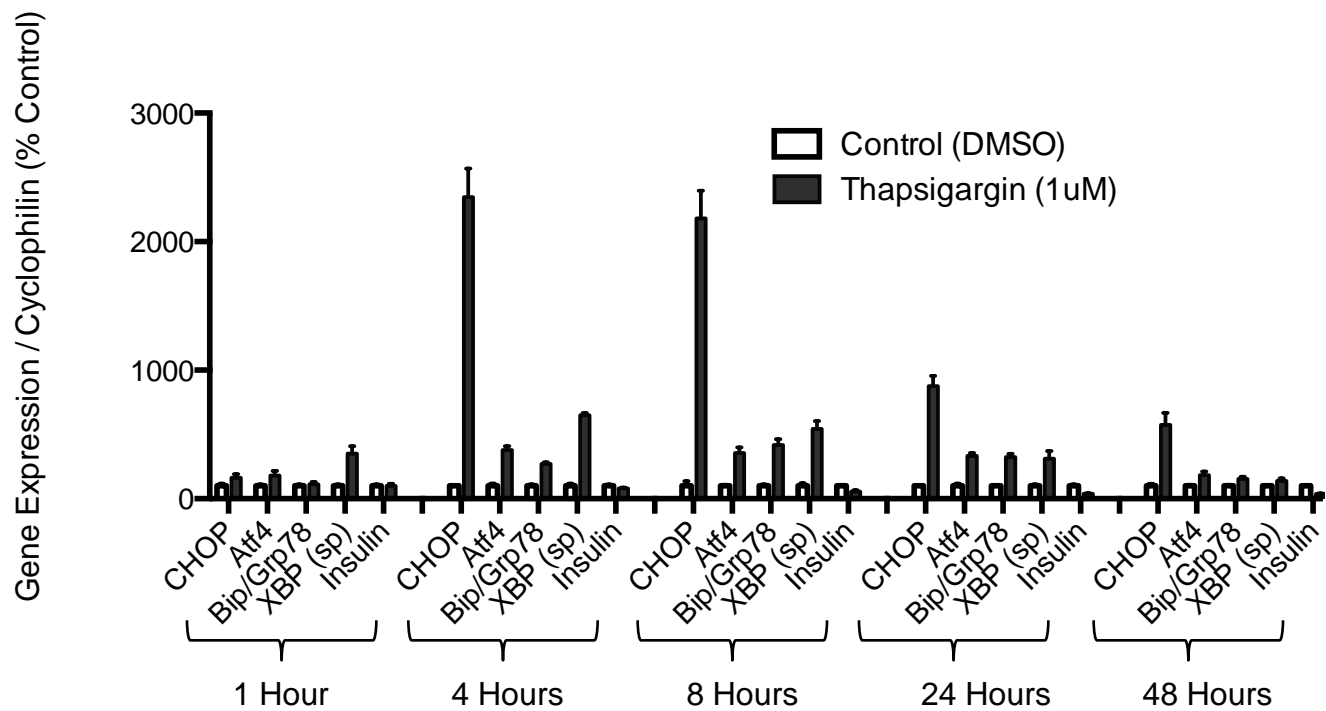

**a**

### *Gata4* Control

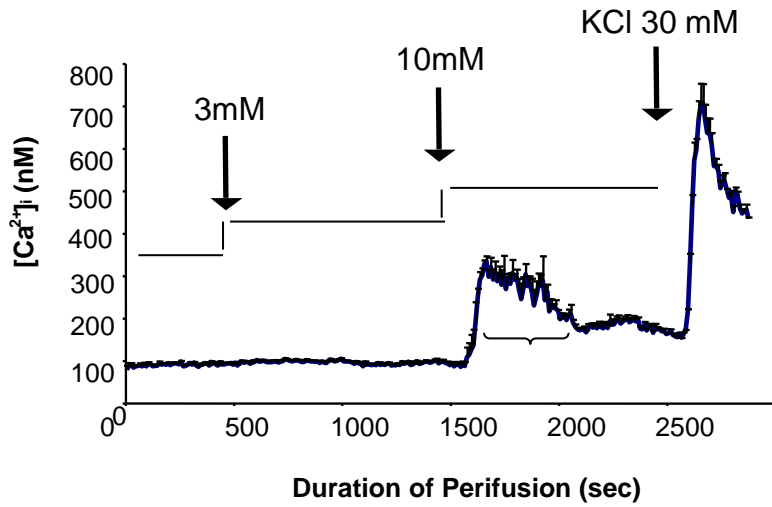

### $\beta$ -cell inducible *Gata4* knockout

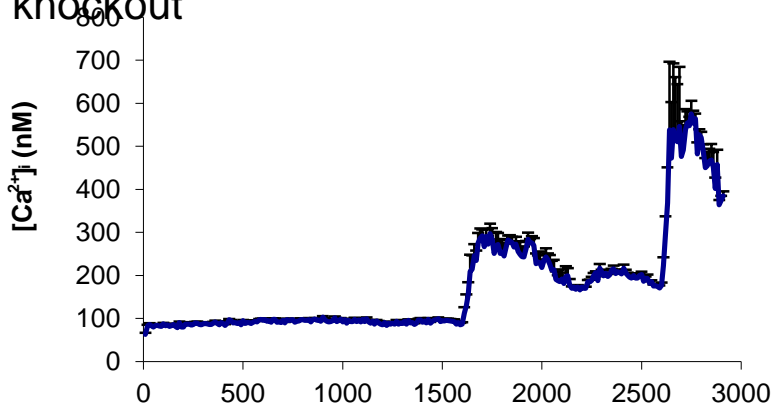

**a***Gata4* Control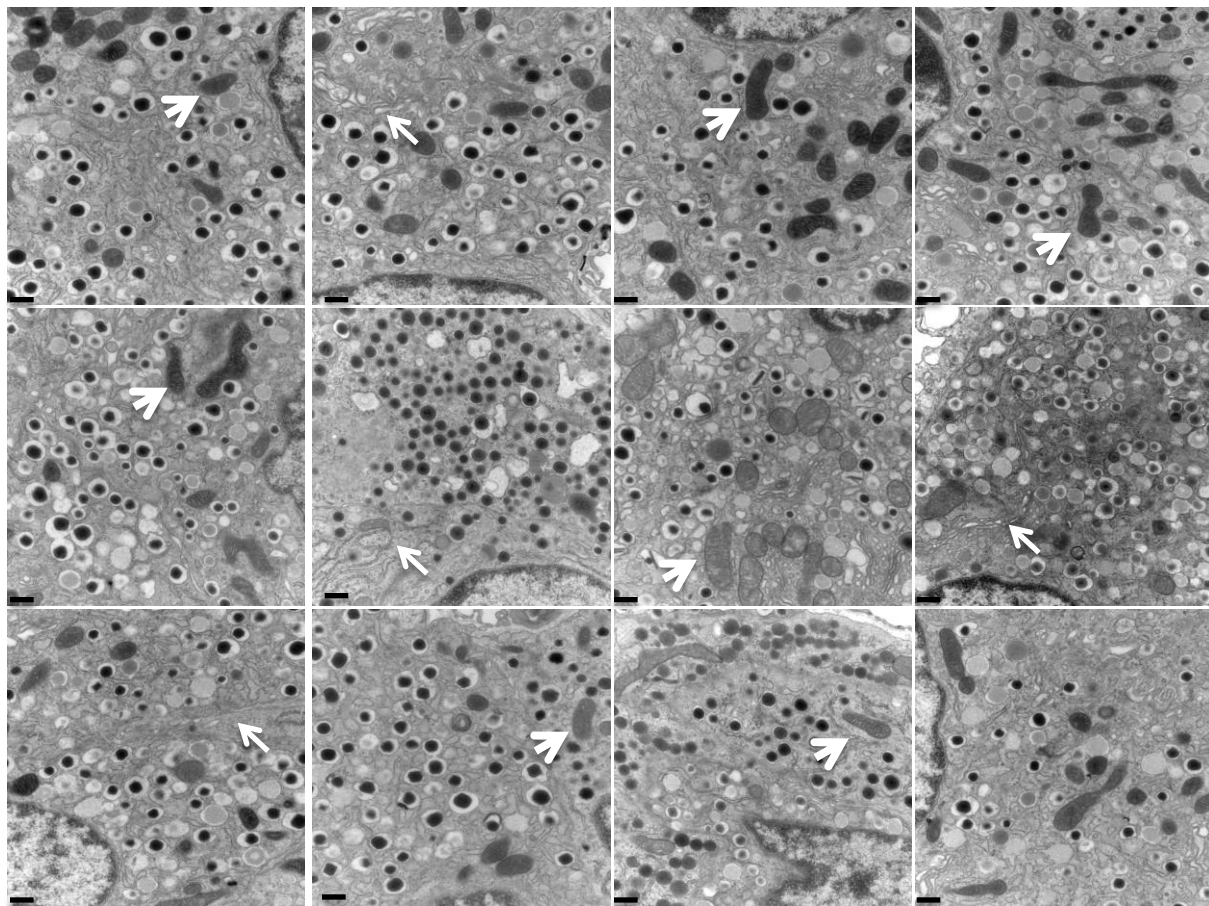 $\beta$ -cell inducible *Gata4* knockout**b**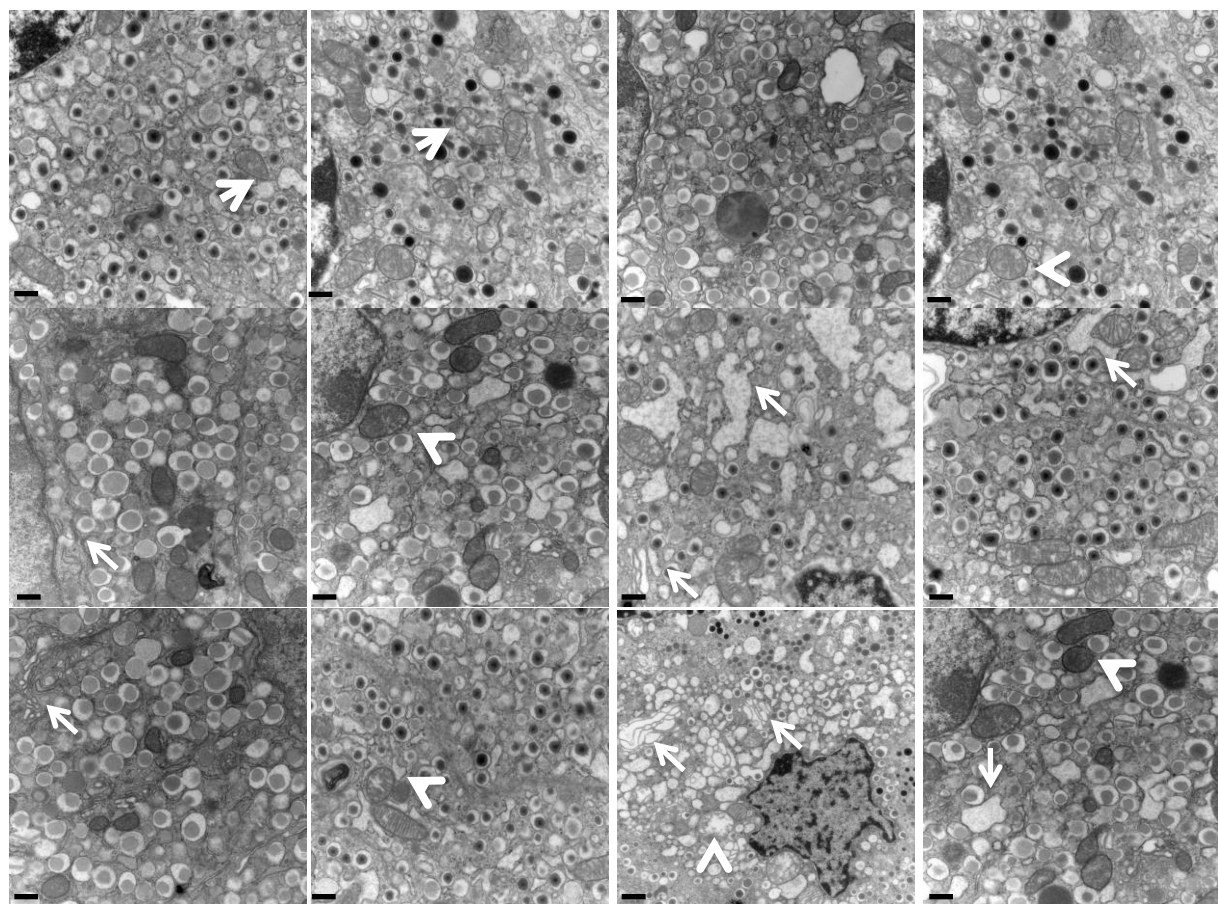

Supplement: me-13-1265-1.pdf [file me-13-1265-1.pdf]
