# Supplementary material
Source: PubMed Central journal article supplement (PMC3874454)
Supplement: me-13-1265.pdf [file me-13-1265.pdf]

**Supplemental Table 1, Sartori et al**

| <b>Gene</b>             | <b>Forward</b>                  | <b>Reverse</b>                     | <b>Probe</b>                                              |
|-------------------------|---------------------------------|------------------------------------|-----------------------------------------------------------|
| Atf4                    | GGCTATGGATGATGGCTTG             | TCGAAACAGAGCATCGAAGT               | AGGCATCCTCCTTGCCGGTG                                      |
| Grp94                   | GGCTCAAGGACAGATGATGA            | CCTGTTCACCTTCAGCTTGGGA             | TCTGTGATGCGTTTAACCCATCCAA                                 |
| XBP (spliced)           | CTGAGTCCGCAGCAGGT               | TGTCAGAGTCCATGGGAAGA               | GGCCCAGTTGTACCTCCCC                                       |
| XBP (total)             | CACCTTCTTGCCCTGCTGGAC           | GGGAGCCCTCATATCCACAGT              | N/A                                                       |
| Bip/Grp78               | AGGAGACTGCTGAGGCAT              | CAGCATCTTTGGTTGCTTGT               | CCAGCTTACTTCAATGATGCCCAGC                                 |
| Hspa1a                  | AAGCAGACGCAGACCTTCA             | CTCGTACACCTGGATCAGCA               | CTACTCGGACAACCAGCCCCGG                                    |
| Hspa1L                  | GGATGCCAAGATGGATAAAG            | CTTGTGAGATCCCGTCCAT                | TCCACCCGCATCCCAAAGGT                                      |
| Wsf1                    | GTCCCATGAAGGCAGATGT             | GCTGAGCAGCTGTTGAGTTC               | ACGCCTTGCCAACGATGCAG                                      |
| Herpud2                 | GTCCTCCAGTTTCCAAAA              | TTGAATCCGAATGGTCTGAA               | CCAGCACCGATAGAGGAAGT                                      |
| Edem1                   | TCTGGTTGATGCCTTGATA             | GCTTCGAAGACCTGGACTGT               | CATCCGAGTTCCAGAAGGCAGTCA                                  |
| Hrd1                    | TGGTGGCTCATGCCTACTAC            | AAGAACACCTTGCCCATCAC               | TGGCAGTCTGTACATCCAGGCC                                    |
| Chop                    | TGGGGGCACCTATATCTCAT            | GATGTGCGTGTGACCTCTGT               | TGGCCCTGGCTCCTCTGTCA                                      |
| Bim isoform 1           | CCAGGCCTTCAACCACTATC            | GCTCCTGTGCAATCCGTATC               | ACCTGAAGATCTGCGCCCCGG                                     |
| Bim isoform 2           | ACAAACCCCAAGTCCCTCTT            | GCTCCTGTGCAATCCGTATC               | ACCTGAAGATCTGCGCCCCGG                                     |
| Bim isoform 3           | ATCGGAGACGAGTTCAACGA            | ACCATTTGAGGGTGGTCTTC               | TTGCAAATGATTACCGCGAGGC                                    |
| Bcl2                    | GCCCTGTGGATGACTGAGTA            | CAGCCAGGAGAAATCAAACA               | ACCGGCATCTGCACACCTGG                                      |
| Bak                     | ATGGCATCTGGACAAGGAC             | GCTTCGAAAAGACCTCCTCTG              | CTCATCGCAGCCACCTTCG                                       |
| Bad                     | GAGGAGGAGCTTAGCCCTTT            | CTCTTTGGGCGAGGAAGTC                | CAATCTCTGGGCAGCGCAGC                                      |
| Bax                     | TTGGAGATGAACTGGACAGC            | CCAGTTGAAGTTGCCATCAG               | ACATGTCAGCTGCCACCCGG                                      |
| Fas                     | GTGGATCTGGGCTGTCTT              | TCCTTGATATAATCCTTCTGAGCA           | TTCACGAACCCGCCTCCTCA                                      |
| Insulin                 | CTTCAGACCTTGCCGTTGGA            | ATGCTGGTGCAGCACTGATC               | CCCCGGCAGAAGCGTGGCATT                                     |
| Amylase                 | AAATCTGCACAAGGTCTGGA            | CCACAGGTAAGTCTGTTTCC               | CGGACACCAACATTGTTGCACCT<br>CAACCCTGGAAGACACCCCAATCTC<br>G |
| Gata4                   | GTCTGCACAGCCTGCCT               | TGACACACTCTCTGCCTTCTGAG            |                                                           |
| Gata6                   | CAAGATGAATGGCCTCAGCA            | GTTGGCACAGGACAGTCCAA               | AAGCGCGTGCCTTCATCACGG                                     |
| Cyclophilin             | CAGACGCCACTGTGCTTT              | TGCTTTGGAACCTTGTCTGCAA             | CCCTTGGGCCGCGTCTCCTT                                      |
|                         |                                 |                                    |                                                           |
| Pnli1p1                 | CCTTGGATGCTTTTCTGATGCTG         | GCACATGTCAACCACCCAGTTC             | N/A                                                       |
| Pnli1p2                 | TTGCTATGGACACCTTGGATGC          | CAGCAACCAGCCTTCTTCTCC              | N/A                                                       |
| Clu                     | GAGATTGAGAACGCCGTCCA            | GCTCCTGCAGACACGTGCATA              | N/A                                                       |
| Nr5a2                   | GCCAAATTGACAAAACGCAGA           | GAGGCAAGGCTACATGGCTCA              | N/A                                                       |
| Zg16                    | CCATCACCGCCTTCCGTATC            | CAGAGCCAGATCGCCACTAA               | N/A                                                       |
| Prss3                   | CCCCTACCAGGTGTCCCTGA            | GCCCCAGCCAGAGATGAGAC               | N/A                                                       |
| Pla2gb1                 | CTGCTGCACACAGCATCAGC            | CTCCCGGAGCATGAGTAGGAG              | N/A                                                       |
| Gp2                     | GGCATTGTCAGCCACACAGC            | CCTGCCTACAGACACAGGACCA             | N/A                                                       |
| Homer2                  | GCTGCCAATGTGAAGAAGTGG           | TGGGACCTCTGACTCCAGCTC              | N/A                                                       |
| Tff2                    | GGCTGACACCCCAACAGAGA            | CACCAGGGCACTTCAAAGATCA             | N/A                                                       |
| Efna5                   | CCAGAGGGGTGACTACCACATTG         | TCTTCCGTTGTCTGGGATTGC              | N/A                                                       |
| Rgs3                    | CTGTAACCCTGCCCGGACTC            | GGAGGTAGAGGGGATTTCTCAGG            | N/A                                                       |
| Rnf4                    | CTGCTGCCAGACCATCAAA             | TGCTGCCCACTGAACATCAC               | N/A                                                       |
| Prss2                   | GACCAGTGGGTGGTGTCTGC            | TGCCCCAGCCAGAGATGAG                | N/A                                                       |
|                         |                                 |                                    |                                                           |
| Gata4 loxp              | GAAGACACCCCAATCTCGGTGAGTTAC     | GTGAAAACCCCTACAGGAAAGTCATCT        | N/A                                                       |
| Gata6 loxp              | ACCCTACTATGACCAATTCCAGAACGAT    | GTGGAAATAGCTAGAAAAGGCAACCTGT       | N/A                                                       |
| CHOP wt                 | AATTCTACGTGTTAGAAAAGGGACAAG     | GAGACAGGGTCTTGTATAGGCTACATT        | N/A                                                       |
| Beta gal                | GTTGCAGTGCACGGCAGATACACTT       | GCCACTGGTGTGGCCATAATTCAA           | N/A                                                       |
| Ins-Cre <sup>ERT</sup>  | GCATTACCGGTGCGATGCAACGAGTGATGAG | GAGTGAACGAACCTGGTCAAAATCAGTGC<br>G | N/A                                                       |
| Ubc-Cre <sup>ERT2</sup> | CGCTCGGGGTTGGCGAGTGTGTTTTGTGAA  | GCCTGGCGATCCCTGAACATGTCCATCAG<br>G | N/A                                                       |
